# Supplementary material
Source: MDPI journal article supplement (https://www.mdpi.com/2071-1050/14/6/3690)
Supplement: s1 [file s1]

**Personal Information:**

\* Study Qualification : ☐ PhD ☐ Master ☐ Bachelor ☐ Diploma ☐ High school ☐ Elementary school

Position: ☐ Student ☐ Teacher ☐ Educational manager.

\* Age/Years: ☐ From 12–17 ☐ From 18 – 24 ☐ From 25 – 31 ☐ From 32 – 38 ☐ From 39–45 ☐ 46 and above.

\* Gender: ☐ Male ☐ Female

| Item                         | Question                                                                                                                                                                                                   |
|------------------------------|------------------------------------------------------------------------------------------------------------------------------------------------------------------------------------------------------------|
| <b>Perceived Ease of Use</b> |                                                                                                                                                                                                            |
| PEOU 1                       | Learning to operate the E-Learning system is easy for me once appropriate teaching aids are provided.                                                                                                      |
| PEOU 2                       | I believe that using the e-learning improves my performance in my studies.                                                                                                                                 |
| PEOU 3                       | It is easy for me to become skillful in using the E-Learning system once I get a suitable guide.                                                                                                           |
| PEOU 4                       | I would find the E-Learning system easy to use if I got suitable training.                                                                                                                                 |
| PEOU 5                       | I would find it easy to get the E-Learning system to do what I want.                                                                                                                                       |
| <b>Perceived Usefulness</b>  |                                                                                                                                                                                                            |
| PU 1                         | Using the E-Learning system is an efficient way to access my courses quickly.                                                                                                                              |
| PU 2                         | I am using an E-Learning system to increase learning efficiency.                                                                                                                                           |
| PU 3                         | I think using E-Learning services will be useful.                                                                                                                                                          |
| PU 4                         | Using the E-Learning system would improve my job performance.                                                                                                                                              |
| PU 5                         | Using the E-Learning service will enhance my effectiveness in learning.                                                                                                                                    |
| <b>Attitude Toward</b>       |                                                                                                                                                                                                            |
| ATT 1                        | Using the E-Learning portal to access learning services is a good idea.                                                                                                                                    |
| ATT 2                        | E-Learning helps me to organize my learning process better.                                                                                                                                                |
| ATT 3                        | Using the E-Learning portal to access learning services would be pleasant.                                                                                                                                 |
| ATT 4                        | The E-Learning system makes work more enjoyable.                                                                                                                                                           |
| ATT 5                        | By using the E-Learning system, interaction with my classmates is enhanced.                                                                                                                                |
| <b>Behavioural Intention</b> |                                                                                                                                                                                                            |
| BI1                          | I expect my use of the e-learning services to continue in the future.                                                                                                                                      |
| BI2                          | The structural sequence for the design of teaching materials will influence my learning sustainability.                                                                                                    |
| BI3                          | I intend to use the E-Learning portal to access learning services frequently.                                                                                                                              |
| BI4                          | I like to interact with my classmates using the internet through the E-Learning system.                                                                                                                    |
| BI5                          | I like to use online learning services.                                                                                                                                                                    |
| <b>Mentality Acceptance</b>  |                                                                                                                                                                                                            |
| MA 1                         | Lack of integration of teaching material content in the E-Learning system will affect my learning's effectiveness.                                                                                         |
| MA 2                         | I doubt that online communication between students and teachers is more effective than face-to-face communication from a scientific and social point of view.                                              |
| MA 3                         | The unsuitability of designed teaching materials will influence my learning's effectiveness.                                                                                                               |
| MA 4                         | I accepted technological innovation (e.g., start using digital documents instead of hard copies) in routine /daily tasks.                                                                                  |
| MA 5                         | The lack of information and awareness campaigns (TV, radio, newspapers, banners in government agencies websites, and in shopping malls) from E-Learning officials discourages me from adopting the system. |

| Trust of System |                                                                                                                                                                   |
|-----------------|-------------------------------------------------------------------------------------------------------------------------------------------------------------------|
| TOS1            | E-Learning systems have enough safeguards to make me feel comfortable using them to access educational services.                                                  |
| TOS2            | I trust the educational department's abilities to provide E-Learning effectively and securely.                                                                    |
| TOS3            | I trust the personal information that enters into the e-learning system will be handled securely.                                                                 |
| TOS4            | Reliable information contributes to the adoption of the use of E-Learning services.                                                                               |
| TOS5            | The availability of the contents and vocabulary of the educational curriculum contributes to enhancing confidence in using the portal and the e-learning system . |
| Interaction     |                                                                                                                                                                   |
| INT 1           | The consistency of computer hardware and software is appropriate to interact with E-Learning services.                                                            |
| INT 2           | It's helpful to communicate with other students and teachers using E-Learning.                                                                                    |
| INT3            | I would find the E-Learning system to be flexible to interact with.                                                                                               |
| INT 4           | My interaction with the E-Learning system would be clear and understandable.                                                                                      |
| INT5            | Lack of internet quality will influence my learning effectiveness interaction.                                                                                    |
